# Supplementary material
Source: Springer Nature journal article supplement (https://www.springermedizin.de/resource/supplementary/12882_2008_99_MOESM1_ESM.pdf/9454990)
Supplement: MOESM1 [file 9454990]

**ESA-resistant Anaemia (n=110)**

1. Stage 4 or 5 CKD
2. Hb  $\leq$ 110 g/L for  $\geq$ 3 mo
3. On EPO  $\geq$  200 IU/kg/wk or DPO  $\geq$ 1 $\mu$ g/kg/wk
4.  $\geq$ 18 yo
5. No clear cause for anaemia

Randomization  
(stratified by centre and disease stage/dialysis type)

1:1

**Placebo**

1 tablet o.d. p.o.  
(n=55)

**Oxpentifylline**

400 mg o.d. p.o.  
(n=55).

4 months observation  
(monthly full blood counts)

**Primary outcome measure:**

Haemoglobin difference between 2 groups
